# Supplementary material for: Out-of-plane polarization induces a picosecond photoresponse in rhombohedral stacked bilayer WSe2
Source: publisher site journal article supplement (doi:10.3762/bjnano.15.109), 2024-11-06
Supplement: Additional file 1 [file 2190-4286-15-109-S1.pdf]

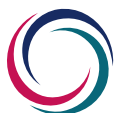

## Supporting Information

for

### **Out-of-plane polarization induces a picosecond photoresponse in rhombohedral stacked bilayer WSe<sub>2</sub>**

Guixian Liu, Yufan Wang, Zhoujuan Xu, Zhouxiaosong Zeng, Lanyu Huang, Cuihuan Ge and Xiao Wang

*Beilstein J. Nanotechnol.* **2024**, *15*, 1362–1368. doi:10.3762/bjnano.15.109

### **Characterization of structure, SHG image, SEM and EDS images, Raman and PL spectrum of WSe<sub>2</sub> and raw TRPC curves for the extraction of response time**

## **Table of Contents:**

Note 1: Side view of crystal structure in bilayer WSe<sub>2</sub>.

Note 2: Direct comparison of SHG intensity between 3R and 2H bilayer WSe<sub>2</sub>.

Note 3: Confirmation of monolayer WSe<sub>2</sub> by PL spectrum.

Note 4: Electronic characteristics of the WSe<sub>2</sub> two-terminal device.

Note 5: Basic characterizations of WSe<sub>2</sub>.

Note 6: TRPC curves of the graphene/3R WSe<sub>2</sub>/graphene heterojunction and graphene in heterojunction at different probe powers.

### Note 1: Side view of crystal structure in bilayer WSe<sub>2</sub>.

The crystal structure of 3R bilayer WSe<sub>2</sub> with AB stacking is given in the main text (Figure 1a). When the 3R bilayer WSe<sub>2</sub> with BA stacking order, the selenium atoms (Se, purple dots) are directly above the tungsten atoms (W, blue dots), leading to upward spontaneous polarization (Figure S1a). The AB and BA stacking order result in opposite polarization directions [1]. In contrast, the zigzag directions of the two monolayer WSe<sub>2</sub> are aligned at an angle of 180° (or 60°) [2,3], forming the 2H phase with spatial inversion symmetry (Figure S1b). Therefore, there is no out-of-plane spontaneous polarization in 2H WSe<sub>2</sub> [4]. The difference in symmetry between 3R and 2H WSe<sub>2</sub> is clearly evident from their crystal structures.

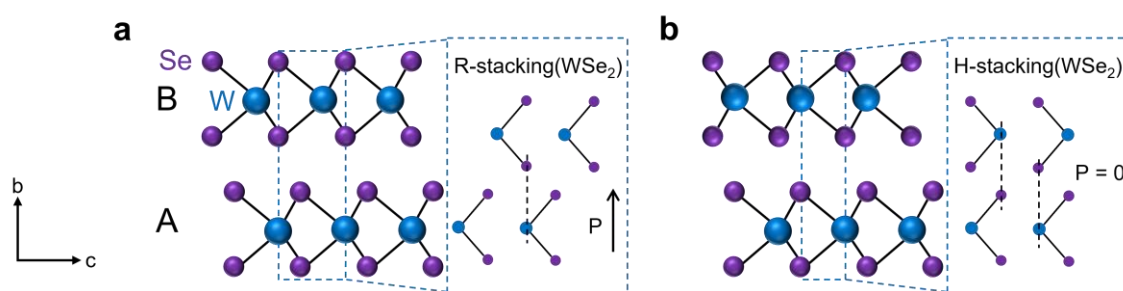

**Figure S1: Side views of crystal structure in bilayer WSe<sub>2</sub>.** **a** 3R phase with BA stacking order. **b** 2H bilayer WSe<sub>2</sub>.

### Note 2: Direct comparison of SHG intensity between 3R and 2H bilayer WSe<sub>2</sub>.

To clearly compare the symmetry differences between the 3R and 2H phases, we simultaneously recorded the SHG intensity maps of bilayer WSe<sub>2</sub> for both phases. First, we stacked an additional monolayer of WSe<sub>2</sub> onto the same monolayer at 0° and 180°, respectively, to construct the 3R and 2H phases (optical image is shown in Figure S2a). The entire area containing the 3R and 2H bilayer WSe<sub>2</sub> was scanned with 800 nm pulsed

laser, and the resulting SHG map is shown in Figure S2b. The difference in SHG intensity among the single layer, 3R bilayer, and 2H bilayer WSe<sub>2</sub> is clearly observed in the SHG image, consistent with Figure 2c in the main text.

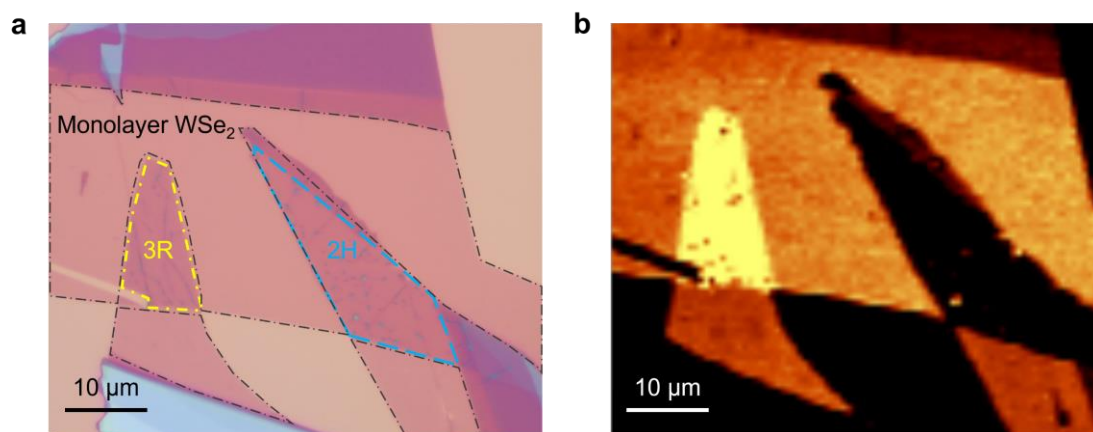

**Figure S2:** **a** Optical image of artificially stacked 3R and 2H bilayer WSe<sub>2</sub>  
**b** Corresponding SHG image.

**Note 3: Confirmation of monolayer WSe<sub>2</sub> by PL spectrum.**

Monolayer WSe<sub>2</sub> exhibits a direct band gap, leading to strong photoluminescence, in contrast to few-layer to bulk WSe<sub>2</sub>, which is considered to have an indirect band gap [5,6]. Hence, the PL spectrum can be used to ascertain the monolayer nature of mechanically exfoliated WSe<sub>2</sub>, facilitating the subsequent artificial stacking of 3R WSe<sub>2</sub>. The peak position of PL for a monolayer WSe<sub>2</sub> is around 750 nm.

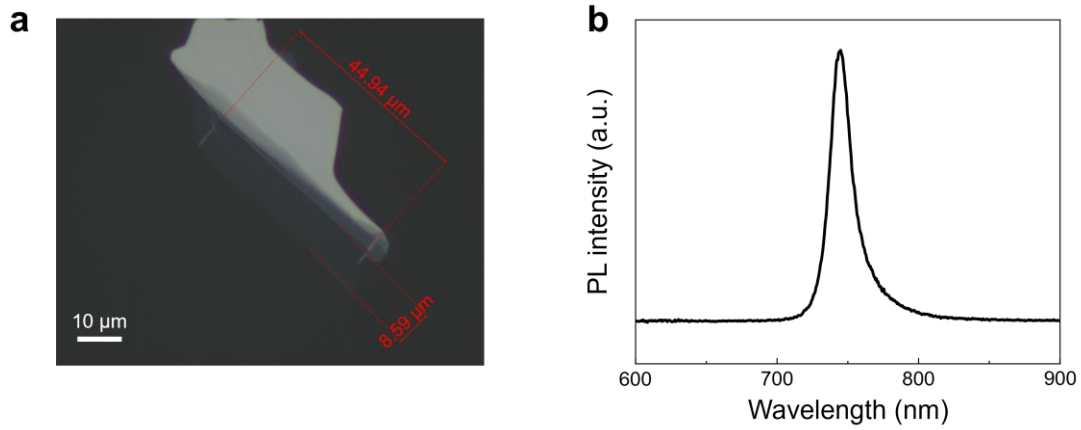

**Figure S3:** **a** Optical image of monolayer WSe<sub>2</sub> **b** Corresponding PL spectra at room temperature.

**Note 4: Electronic characteristics of the WSe<sub>2</sub> two-terminal device.**

We fabricated a WSe<sub>2</sub> two-terminal device to compare the graphene/WSe<sub>2</sub>/graphene devices. The two-terminal device is constructed with WSe<sub>2</sub> as the channel material, a dielectric layer of approximately 290 nm SiO<sub>2</sub>, and two parallel metal electrodes, composed of 10 nm Cr and 50 nm Au, functioning as the source and drain. The output characteristic curve  $I_{ds}-V_{ds}$  in the device is shown in Figure S4a. The transfer characteristic curves  $I_{ds}-V_g$  show an ambipolar channel conductance in WSe<sub>2</sub> (Figure S4b).

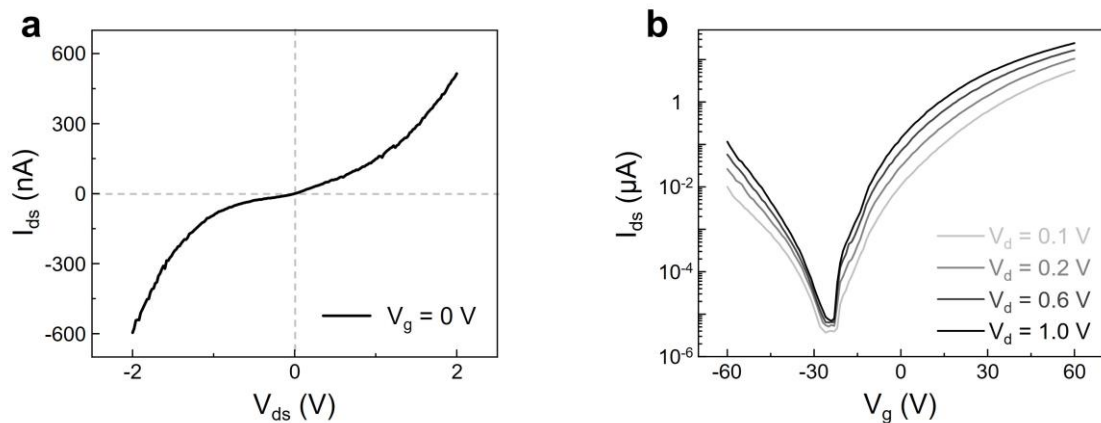

**Figure S4: Electronic characteristics of the WSe<sub>2</sub> two-terminal device.** **a** Output characteristic curves  $I_{ds}-V_{ds}$  at  $V_g = 0V$ . **b** Transfer characteristic curves  $I_{ds}-V_g$  with source-drain voltages varying from 0.1 V to 1.0 V on the semi-logarithmic scale.

**Note 5: Basic characterizations of WSe<sub>2</sub>.**

To confirm the quality of the materials used, we performed Raman and scanning electron microscopy (SEM) measurements.

The Raman spectrum was obtained using a 532 nm continuous-wave laser as the excitation source. For the monolayer (1L) WSe<sub>2</sub>, the spectra showed the characteristic peak of WSe<sub>2</sub> peak at 260 cm<sup>-1</sup> (2LA(M)), as shown in Figure S5.

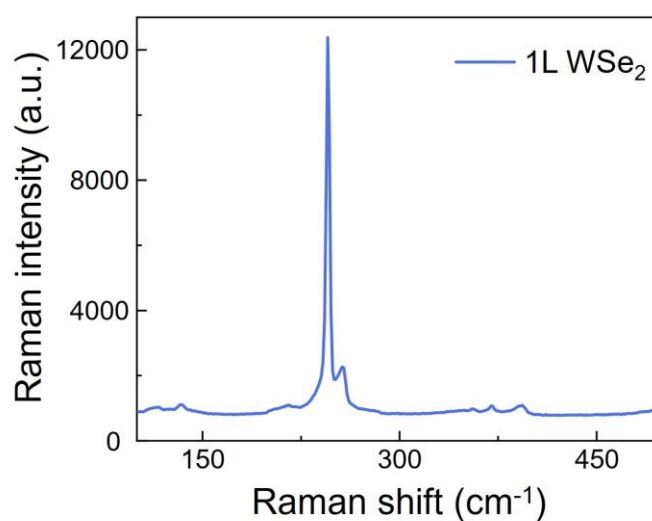

**Figure S5:** Raman spectrum of the monolayer WSe<sub>2</sub>.

Scanning electron microscopy (SEM) measurements were performed on WSe<sub>2</sub> on a 290 nm SiO<sub>2</sub>/Si substrate. The elemental mapping of the energy-dispersive spectroscopy (EDS) analysis (Figure S6c) confirmed tungsten (W) and selenium (Se) in the material.

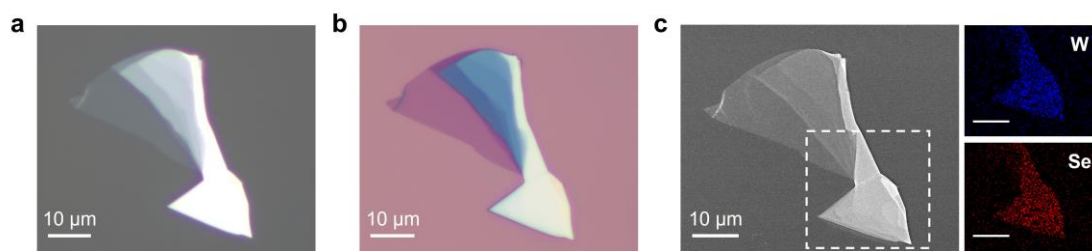

**Figure S6:** Scanning electron microscopy (SEM) measurements of WSe<sub>2</sub>. **a** Optical image of the mechanically exfoliated WSe<sub>2</sub> on poly-dimethylsiloxane films (PDMS) **b** Optical image of the transferred the WSe<sub>2</sub> on silicon substrate. **c** Top view SEM and EDS image of WSe<sub>2</sub> on silicon substrate.

**Note 6: Probe power dependent TRPC measurements of the graphene/ 3R WSe<sub>2</sub>/graphene heterojunction and graphene in heterojunction.**

In the main text, we compared the probe power dependent intrinsic response time of the heterojunction with that of graphene, as summarized in Figure 3c. We individually displayed the TRPC curves corresponding to each response time in Figure 3c of the main text. Figure S7 (graphene/3R WSe<sub>2</sub>/graphene heterojunction) and S8 (graphene in heterojunction) show the TRPC curves at different probe powers, ranging from 42 μW to 184 μW. The TRPC curves for both the graphene and heterojunction regions remain essentially unchanged with varying probe power.

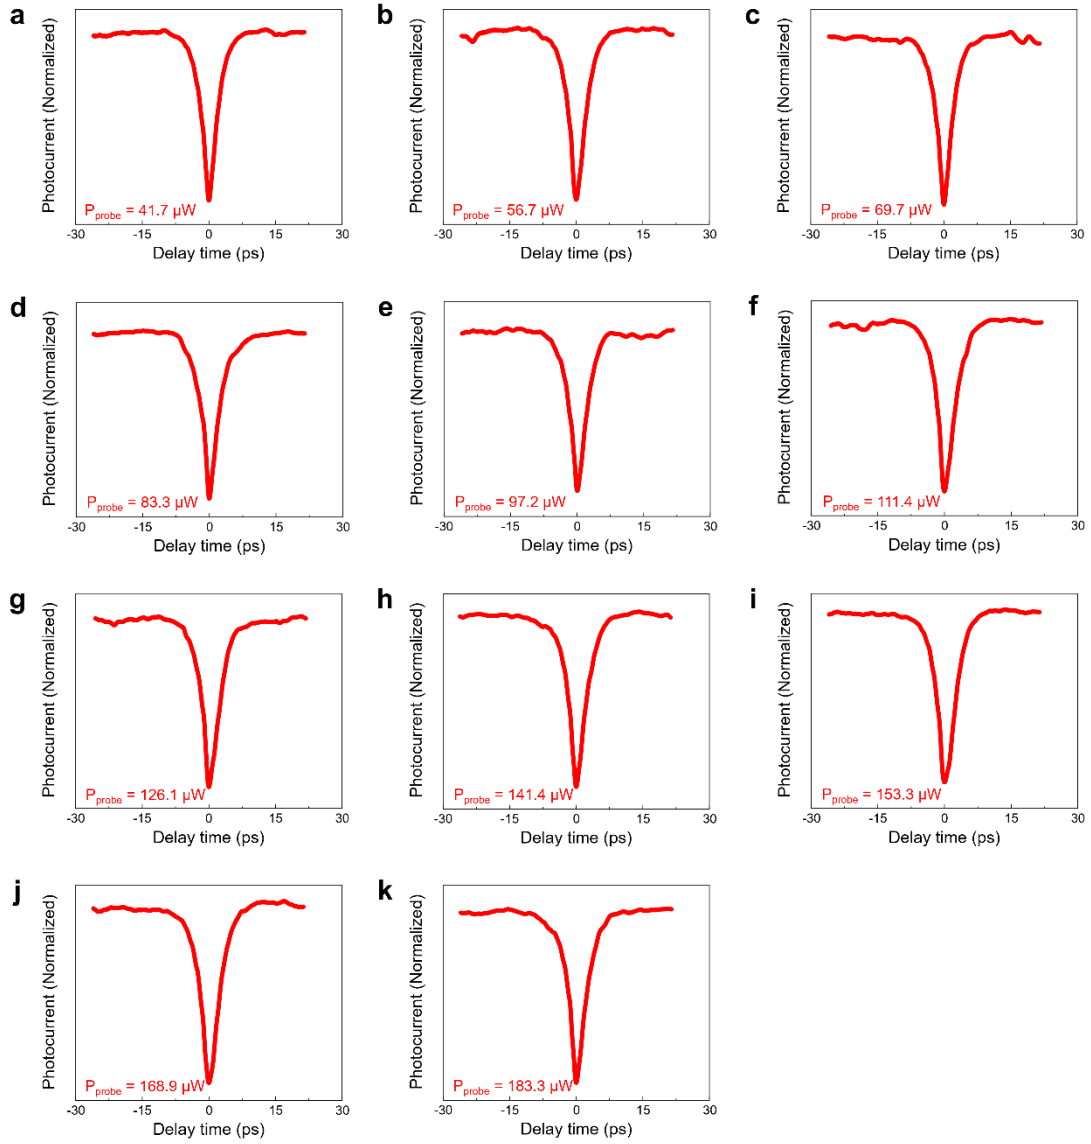

**Figure S7.:** TRPC curves of the graphene/3R WSe<sub>2</sub>/graphene heterojunction at different probe powers, ranging from 41.7  $\mu\text{W}$  to 183.3  $\mu\text{W}$ .



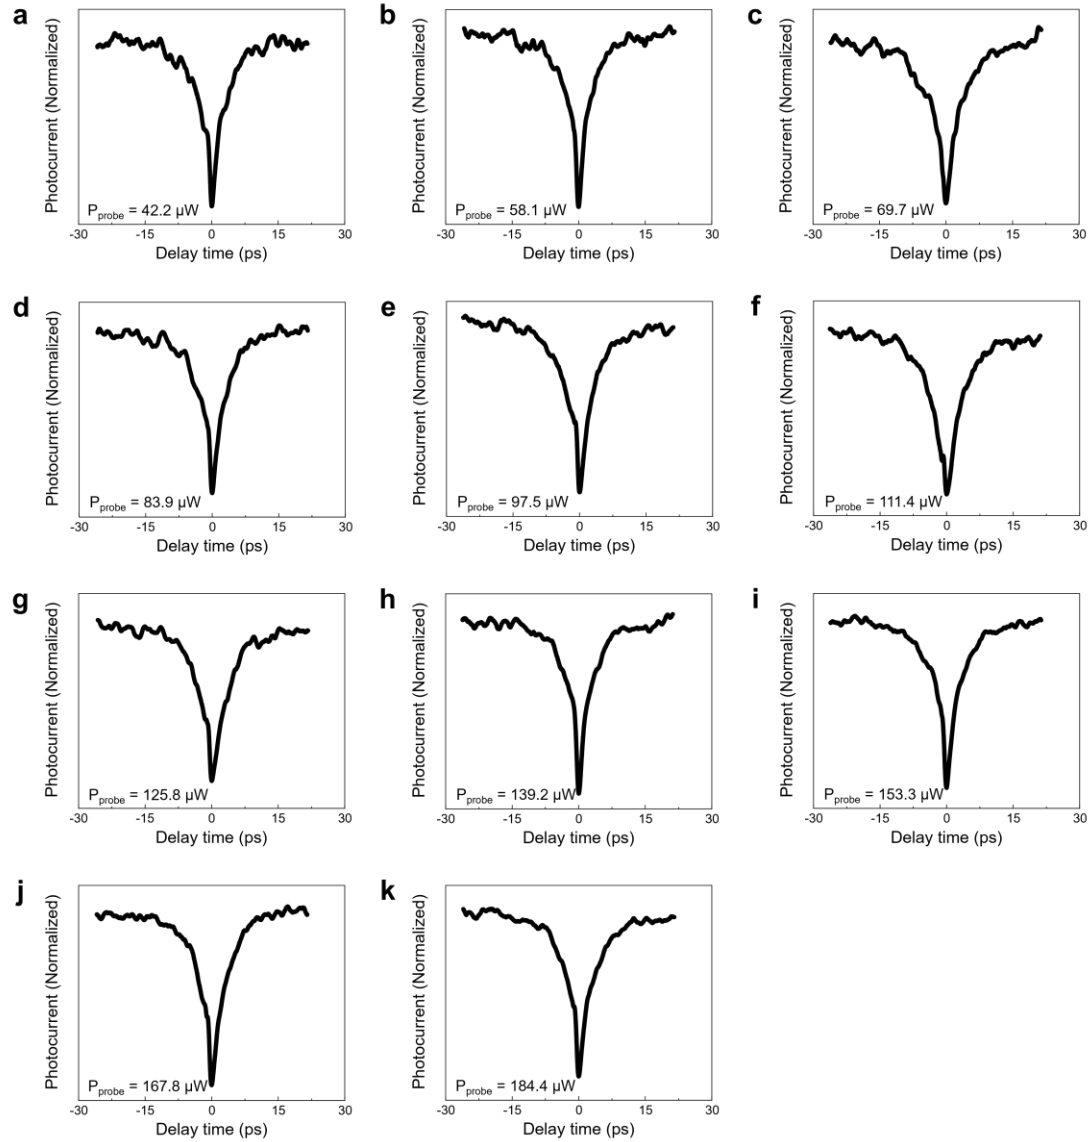

**Figure S8:** TRPC curves of the graphene in heterojunction at different probe powers, ranging from 42.2  $\mu\text{W}$  to 184.4  $\mu\text{W}$ .

## Reference

- [1] Wang, X.;Yasuda, K.;Zhang, Y.;Liu, S.;Watanabe, K.;Taniguchi, T.;Hone, J.;Fu, L. Jarillo-Herrero, P., *Nat. Nanotechnol.* **2022**, 17, 367.
- [2] Ge, C.;Zhang, D.;Xiao, F.;Zhao, H.;He, M.;Huang, L.;Hou, S.;Tong, Q.;Pan, A. Wang, X., *ACS Nano* **2023**, 17, 16115.
- [3] Ge, C.;Huang, L.;Zhang, D.;Tong, Q.;Zhu, X.;Wang, X. Pan, A., *AIP Adv.* **2023**, 13, 115101.
- [4] Yang, D.;Wu, J.;Zhou, B. T.;Liang, J.;Ideue, T.;Siu, T.;Awan, K. M.;Watanabe, K.;Taniguchi, T.;Iwasa, Y.;Franz, M. Ye, Z., *Nat. Photonics* **2022**, 16, 469.
- [5] Mak, K. F. Shan, J., *Nat. Photonics* **2016**, 10, 216.
- [6] Xia, F.;Wang, H.;Xiao, D.;Dubey, M. Ramasubramaniam, A., *Nat. Photonics* **2014**, 8, 899.
